# Supplementary material for: Diabetes Research Matters: A Three-Round Priority-Setting Survey Consultation with Adults Living with Diabetes and Family Members in Australia
Source: Springer Nature journal article supplement (doi:10.1007/s40271-024-00688-5), 2024-04-06
Supplement: MOESM1 [file 26952510]

10,000 email invitations to NDSS registrants, and promotion via social media

Recruitment

13,250 additional email invitations
to NDSS registrants

1088 respondents

20 not eligible
61 missing eligibility data

319 eligible but missing data

Survey 1

21 duplicate responses

1 mistakenly bypassed survey logic (not eligible)

5 invalid responses (e.g. no text, numbers, special characters)

661 respondents, 1,549 unique responses

640 invited (provided email address)
482 responded

108 missing data

75 duplicate responses

Survey 2

4 responses unable to be linked back to Survey 1

295 respondents in analysis

640 invited (provided email address)
359 responded

38 had missing data

3 duplicate responses

2 responses unable to be linked back to Survey 1

Survey 3

2 completed incorrect cohort survey
(excluded from analysis)

314 respondents in final analysis

**Online Resource 1. Recruitment flowchart**
